# Supplementary material
Source: PubMed Central journal article supplement (PMC3587443)
Supplement: cc-12-422-s01.pdf [file cc-12-422-s01.pdf]

## **Supplemental Material to:**

**Gaston Soria and Geneviève Almouzni**

**Differential contribution of HP1 proteins to  
DNA-end resection and homology directed repair**

**Cell Cycle 2012; 12(2)**

**<http://dx.doi.org/10.4161/cc.23215>**

**<http://www.landesbioscience.com/journals/cc/article/23215>**

# Supplementary figure 1

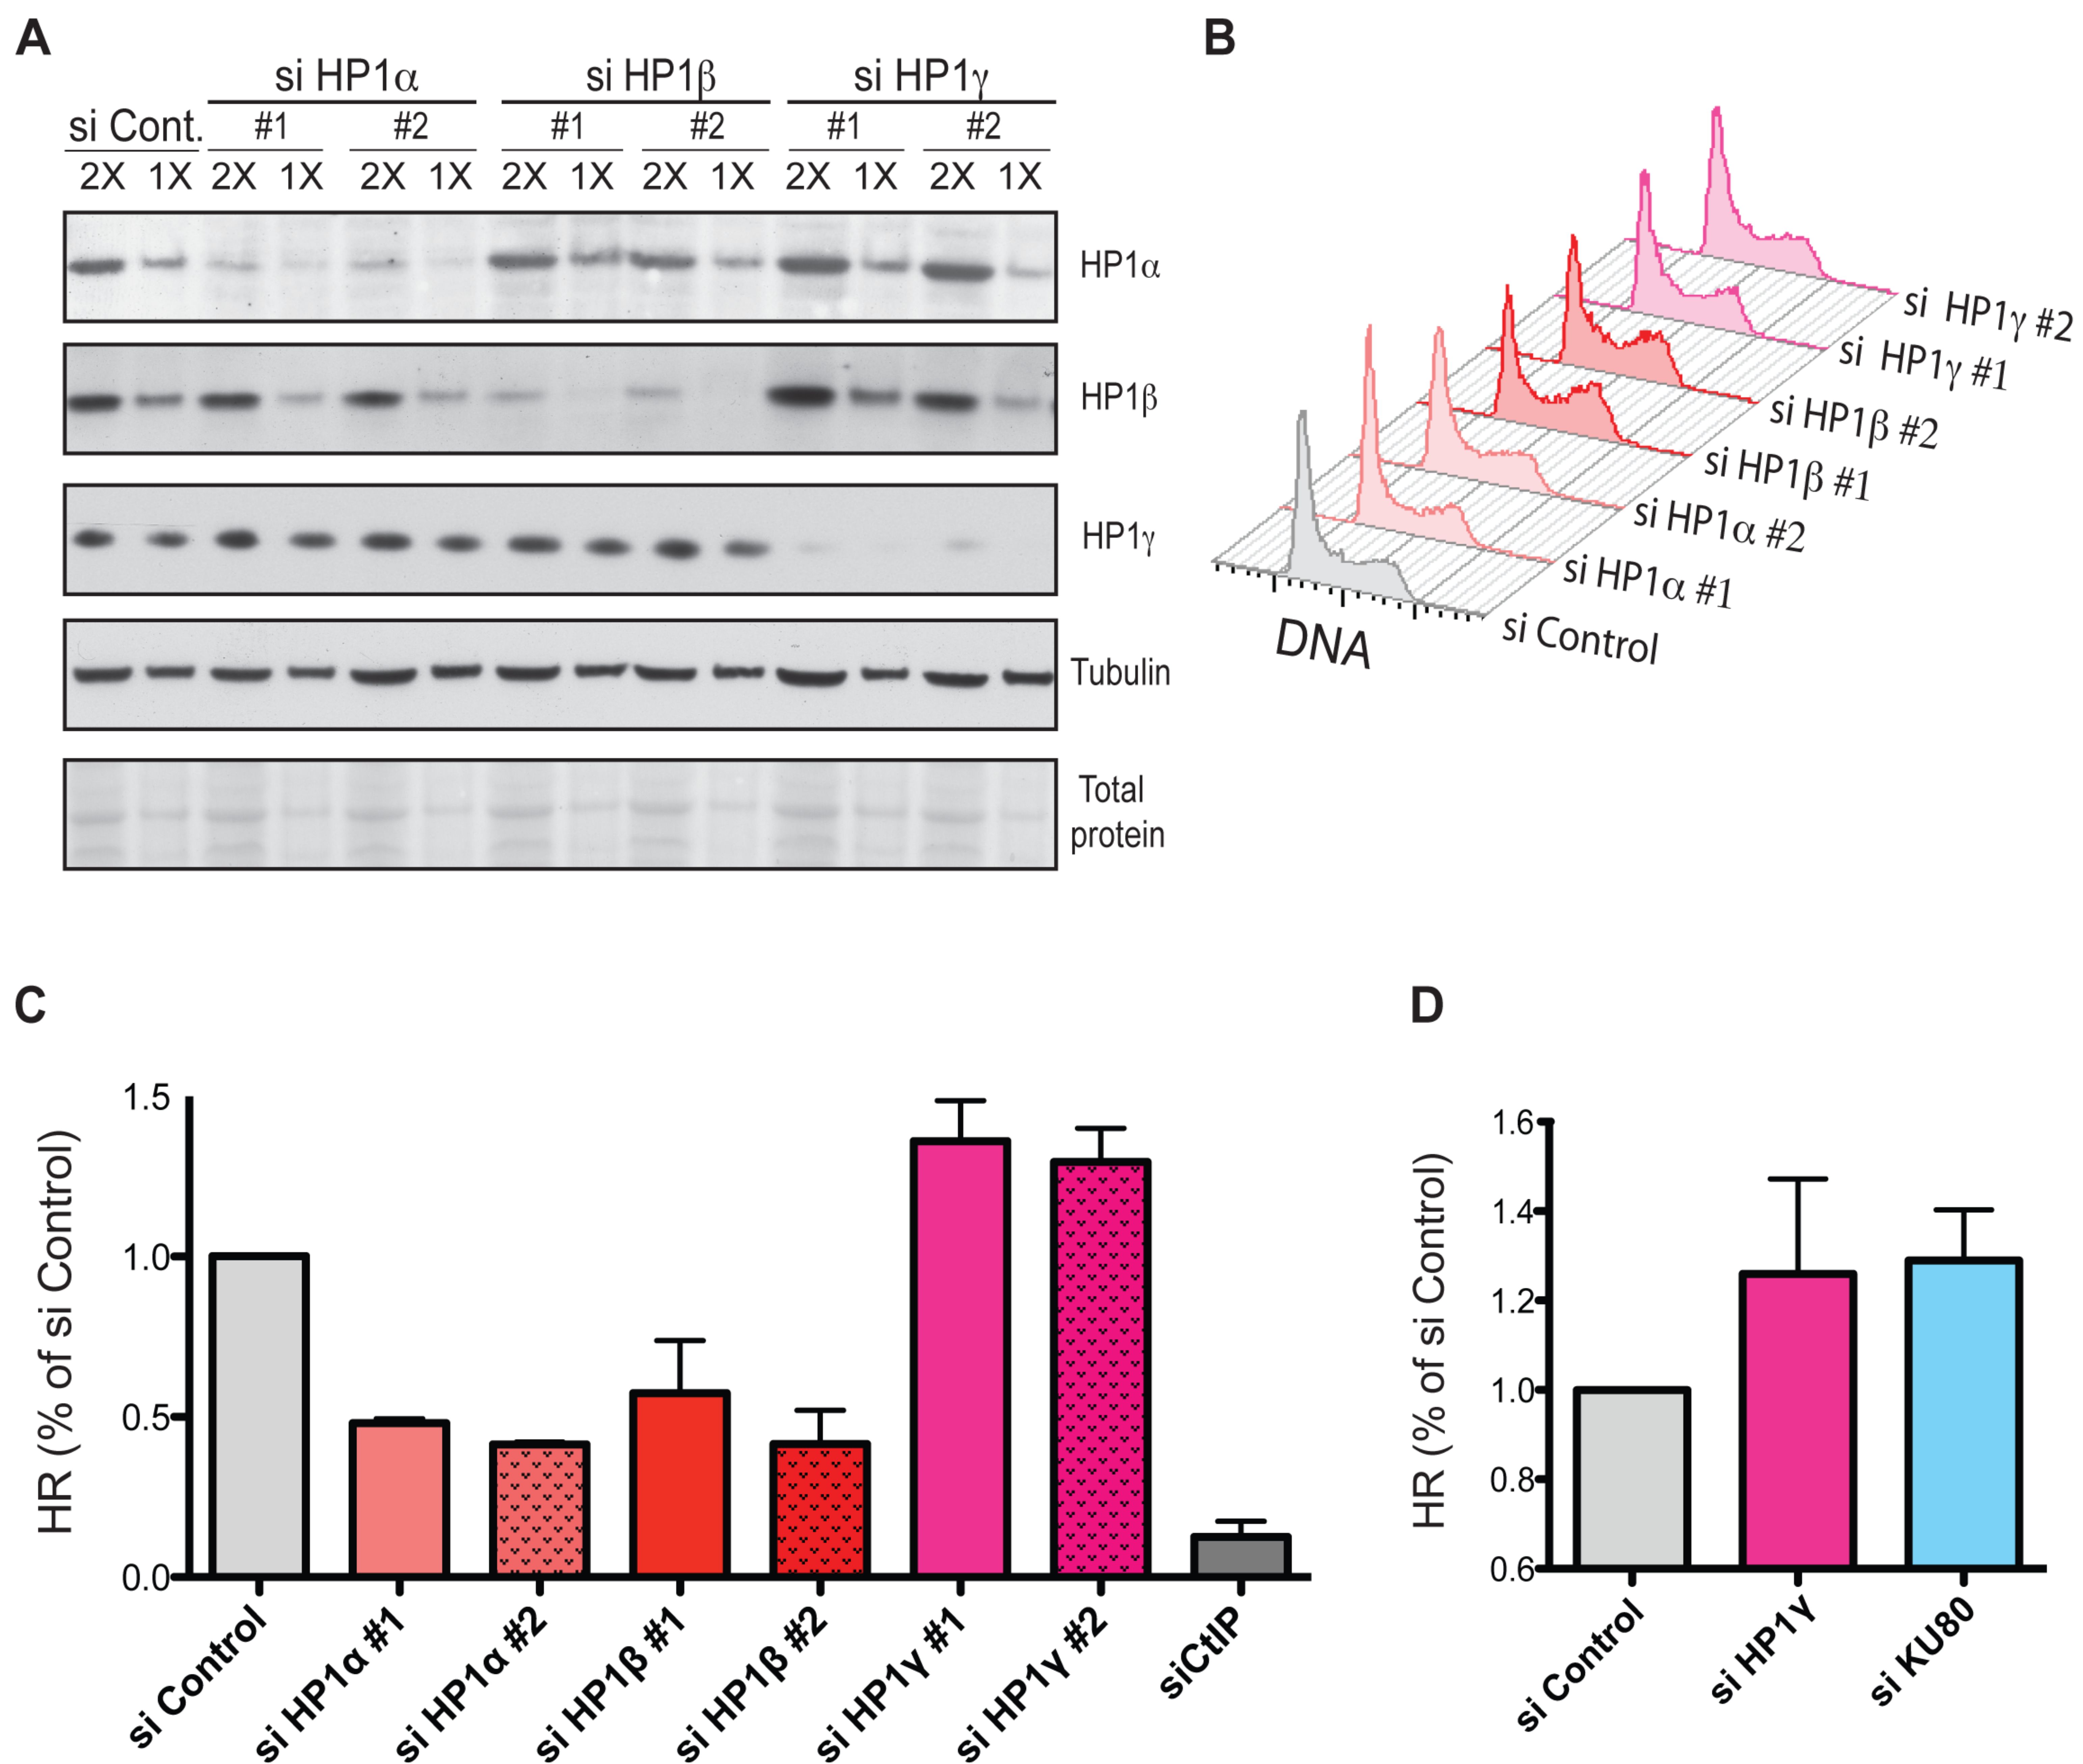

**Supplementary figure 1: HP1 paralogs differentially modulate homology recombination repair.** (A) Control of knockdown efficiency using two different siRNA for each HP1 paralog. (B) Cell cycle progression after siRNA treatment against the three mammalian HP1 paralogs with two different siRNAs. We transfected U2OS cells with siRNAs against HP1 $\alpha$ , HP1 $\beta$  and HP1 $\gamma$  and 48hs after we monitored the knockdown efficiency by WB. Parallel samples were collected for flow cytometry analysis of the cell cycle progression. (C) Homologous recombination repair efficiency after transient knockdown of HP1 paralogs with two different siRNAs normalized to the control siRNA. CtIP knockdown is used as a positive control. Error bars: s.d. from 2 independent experiments. (D) Homologous recombination repair efficiency after transient knockdown of HP1 gamma compared to the transient knockdown of KU80, which was previously reported to stimulate HR. CtIP knockdown is used as a positive control. Error bars: s.d. from 2 independent experiments.
